# Supplementary material for: Bias switchable narrowband/broadband NIR organic photodetector fabricated with a scalable technique
Source: Royal Society of Chemistry journal article supplement (doi:10.1039/d3lf00089c), 2023-09-11
Supplement: d3lf00089c1.pdf [file d3lf00089c1.pdf]

## Supporting Information

### **Bias Switchable Narrowband/Broadband NIR Organic-Photodetector Fabricated with a Scalable Technique**

Lai-Hung Lai<sup>\*a</sup>, Wei-Hsiang Lin<sup>a</sup>, Chin-Chuan Hsieh<sup>a</sup>, Maria Antonietta Loi<sup>†b</sup>

---

<sup>a.</sup> *Wafer Level Optics Organization, VisEra Technologies Company Limited, No. 12, Dusing Rd. 1Hsinchu Science Park, Hsinchu City 30078, Taiwan*

<sup>b.</sup> *Photophysics and OptoElectronics, Zernike Institute for Advanced Materials, University of Groningen, Nijenborgh 4, 9747 AG Groningen, The Netherlands*

\*E-mail: Larry\_Lai@viseratech.com; †m.a.loi@rug.nl Electronic

Supplementary Information (ESI) available: [details of any supplementary information available should be included here]. See DOI: 10.1039/x0xx00000x

Keywords: dual-mode; narrowband; broadband; organic photodetector; bias-dependent detectivity; blade coating; scalable fabrication.

## 1. UV-vis spectra and energy-level diagram of the photoactive material

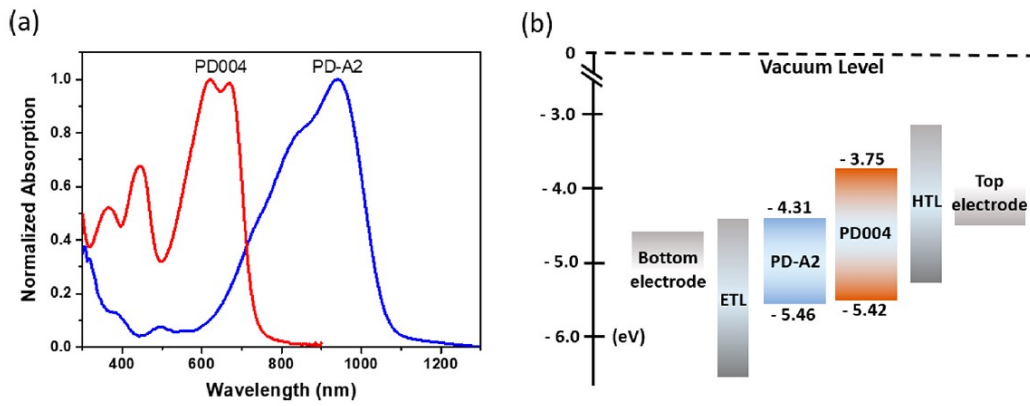

Figure S1. (a) UV-vis spectra and (b) energy diagram of the PD004:PD-A2 BHJ system.

## 2. Dark I-V curve fitting

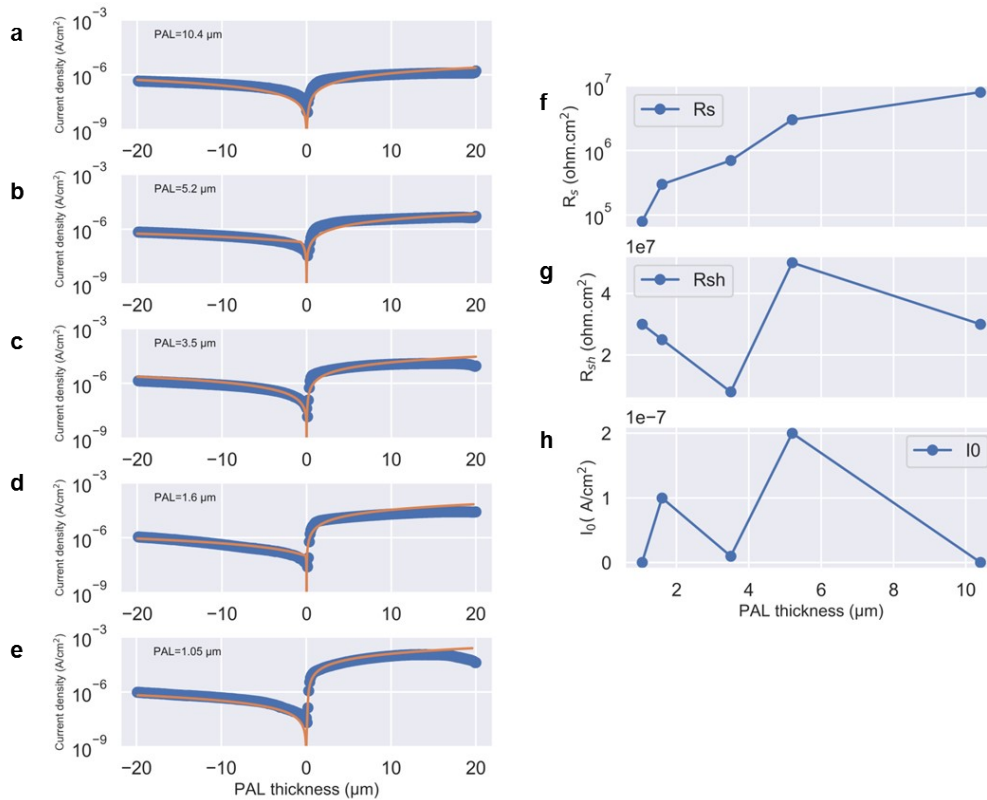

Figure S2. Dark IV curved and fitting summary.

Table S1. Summary of the fitting results.

| PAL thickness (μm)                     | 1.05    | 1.6     | 3.5     | 5.2     | 10.4    |
|----------------------------------------|---------|---------|---------|---------|---------|
| R <sub>s</sub> (ohm.cm <sup>2</sup> )  | 8.0E+04 | 3.0E+05 | 7.0E+05 | 3.0E+06 | 8.0E+06 |
| R <sub>sh</sub> (ohm.cm <sup>2</sup> ) | 3.0E+07 | 2.5E+07 | 8.0E+06 | 5.0E+07 | 3.0E+07 |
| I <sub>0</sub> (A/cm <sup>2</sup> )    | 4.0E-10 | 1.0E-07 | 1.0E-08 | 2.0E-07 | 5.0E-10 |
| n                                      | 1.1     | 1.1     | 1.1     | 1.1     | 1.1     |

### 3. Comparison between the state-of-the-art Si CMOS image sensors with OPD.

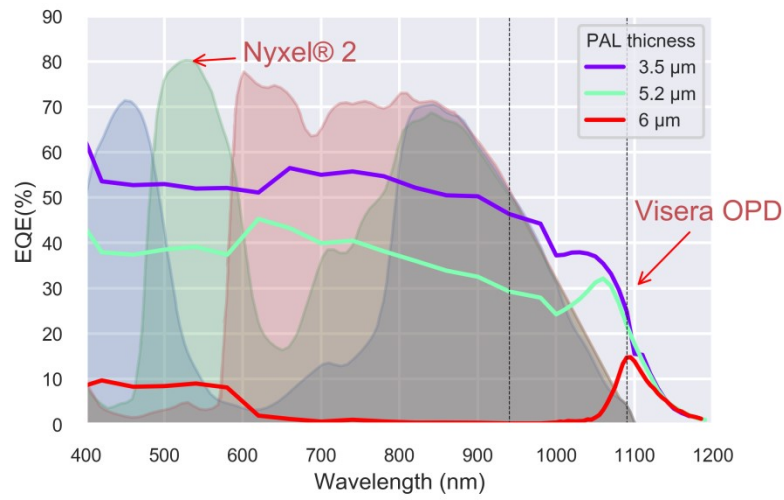

**Figure S3.** EQE spectra for the state-of-art commercial NIR Si image sensor (Nyxel® 2) and Visera's OPD photodetector made by blade coating with various active layers measured at -4V.

#### 4. Absorption spectra of donor and acceptor thin film and the extinction coefficient of the photoactive layer

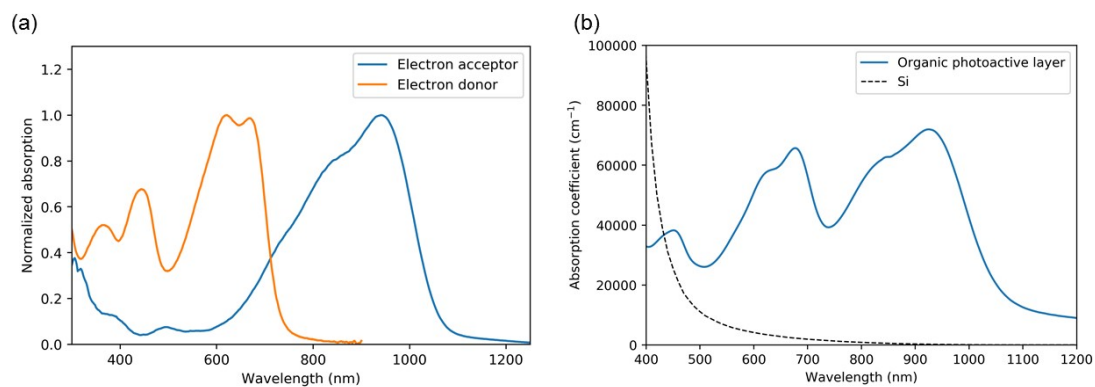

**Figure S4.** (a) The normalized absorption spectra of acceptor and donor thin film. (b) the absorption coefficient of the photoactive layer composed by a mixture of donor and acceptor. The black dash line shows the absorption coefficient of Si as a comparison.

## 5. Summary of the photodetector performance

**Table S2.** Summary of the photodetector performance

|                         | Unit              | Bias | PAL Thickness ( $\mu\text{m}$ ) |        |        |        |        |        |        |
|-------------------------|-------------------|------|---------------------------------|--------|--------|--------|--------|--------|--------|
|                         |                   |      | 0.32                            | 1.05   | 1.6    | 3.5    | 5.2    | 6      | 10.4   |
| f <sub>-3db</sub> at 4V | Hz                |      | NA                              | 23357  | 16238  | 5456   | 379    | 518    | 50     |
| Dark current            | A/cm <sup>2</sup> | -2V  | 8.9e-6                          | 5.5e-8 | 5.8e-8 | 1.1e-7 | 1.4e-7 | 8.0e-8 | 1.4e-7 |
|                         |                   | -4V  | 1.4e-5                          | 8.2e-8 | 8.5e-8 | 1.7e-7 | 2.1e-7 | 1.2e-7 | 2.3e-7 |
|                         |                   | -10V | 9.8e-6                          | 2.7e-7 | 1.7e-7 | 3.3e-7 | 4.0e-7 | 2.5e-7 | 4.9e-7 |
| EQE @940 nm             | %                 | -2V  | 45.9                            | 40.1   | 35.2   | 42.5   | 14.8   | 1.4    | 0.31   |
|                         |                   | -4V  | 47.0                            | 46.3   | 46.2   | 46.4   | 29.3   | 3.7    | 0.2    |
|                         |                   | -10V | 48.1                            | 41.0   | 37.3   | 47.8   | 39.7   | 28.6   | 0.9    |
|                         |                   | -18V | NA                              | NA     | NA     | 48.6   | 42.0   | 43.3   | 17.7   |
| EQE @1100 nm            | %                 | -2V  | 5.9                             | 16.1   | 14.9   | 13.1   | 13.4   | 23.6   | 9.75   |
|                         |                   | -4V  | 6.2                             | 17.2   | 23.1   | 15.5   | 17.7   | 29.5   | 13.9   |
|                         |                   | -10V | 6.53                            | 18.2   | 17.7   | 18.3   | 24.2   | 36.2   | 20.5   |
|                         |                   | -18V | NA                              | NA     | NA     | 19.6   | 27.9   | 39.2   | 22.5   |

## 6. Noise spectral density and detectivity of organic photodetector

When considering the flicker noise (1/f-noise) and the thermal noise on the total noise current of the photodetectors, the detectivity is expressed as  $D = R \times \sqrt{A}/S_n$ , where R is responsivity, A is the device area, and  $S_n$  is the noise spectral density.

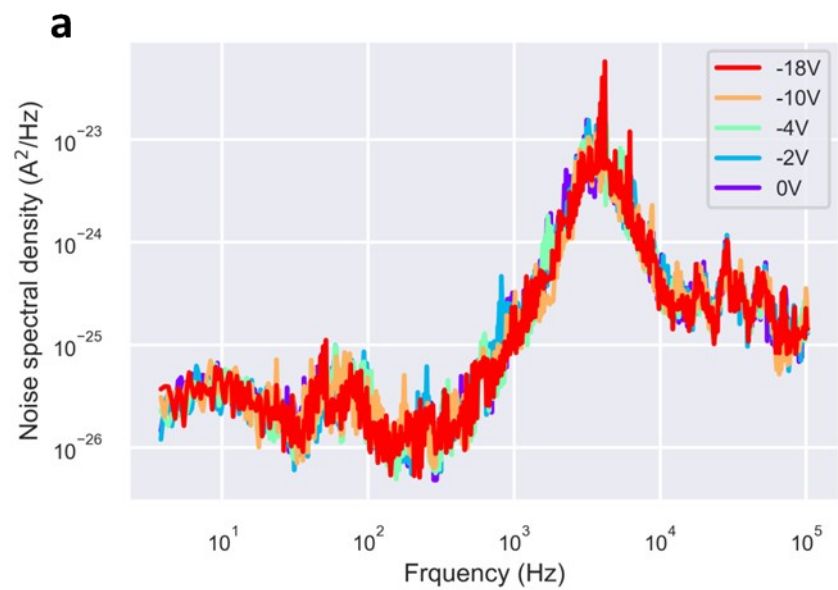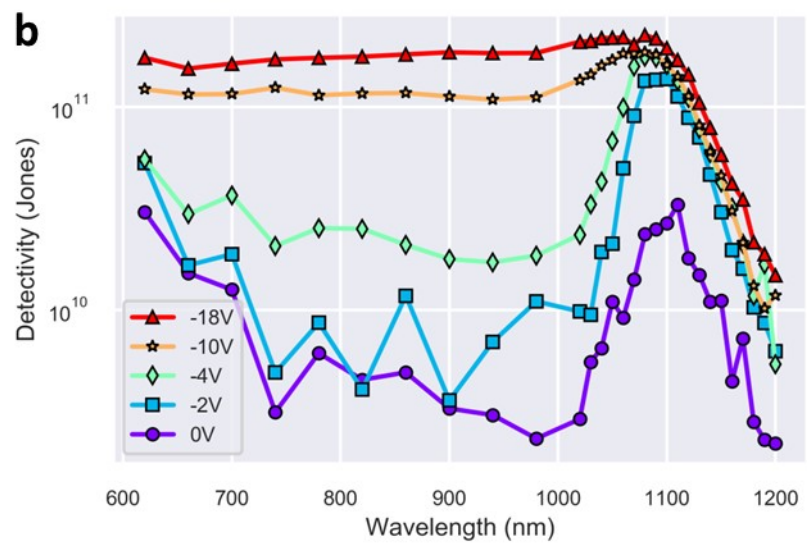

**Figure S5.** (a) Noise spectral density of organic photodetector with 6  $\mu\text{m}$  active layer thickness. (b) Detectivity of the photodetector by considering shot noise, flicker noise (1/f-noise) and thermal noise.

## 7. Summary of narrowband OPD performance from literatures.

**Table S3.** Summary of narrowband OPD performance from literatures.

| Photo-absorbing materials | PAL thickness (nm) | Peak (nm) | FWHM (nm) | D* (Jones) | EQE (%) | R (A W <sup>-1</sup> ) | Bias (V) | LDR (dB) | f -3dB (Hz) | Year | PAL deposition method | Ref.          |
|---------------------------|--------------------|-----------|-----------|------------|---------|------------------------|----------|----------|-------------|------|-----------------------|---------------|
| 3:PC61BM                  | 150                | 500       | 130       |            | 8.2     | 0.03                   | -1.0     |          |             | 2013 | Spin coating          | <sup>1</sup>  |
| 2:PC61BM                  |                    | 525       | 80        | 1.00E+11   | 15      | 0.06                   | -1.0     | 80       | 25,000      | 2014 | Spin coating          | <sup>2</sup>  |
| Cy7-T:C60                 |                    | 850       | 100       | 1.00E+12   | 17      | 0.12                   | -1.0     |          |             | 2015 | Spin coating          | <sup>3</sup>  |
| DPP-DTT:PC70BM            | 2000               | 950       | 90        | 4.8E+12    |         | 0.06                   | -1       | 160      | 100,000     | 2015 | Spin coating          | <sup>4</sup>  |
| PDTP-DFBT: PC71BM: PbS    | 4000               | 890       | 50        | 7.98E11    | 183     | 1.31                   | -7       | 110      | 360         | 2016 | Drop casting          | <sup>5</sup>  |
| P3HT:PTB7-Th: PC61BM      |                    | 800       | 40        | 3.00E+12   |         |                        | -10      | 180      |             | 2018 | Drop casting          | <sup>6</sup>  |
| 1(Pyrl):C60               | 15                 | 481       | 76        | 2.00E+11   | 18      | 0.07                   | 0        |          |             | 2019 | Spin coating          | <sup>7</sup>  |
| PolyTPD:SBDTIC            | 70                 | 740       | 141       | 1.42E+13   | 10.5    | 0.06                   | 0        | 78       | 118,000     | 2019 | Spin coating          | <sup>8</sup>  |
| PCZ-Th-DPP                | 300                | 709       | 170       | 4.60E+12   |         |                        | -1.0     | 109      | 1,200       | 2019 | Spin coating          | <sup>9</sup>  |
| PCbisDPP:PC61BM           |                    | 730       | 210       | 4.70E+11   | 80      | 0.31                   | -3.0     |          |             | 2019 | Spin coating          | <sup>10</sup> |
| PCE10:P3HT/PCBM           | 770                | 780       |           | 1E+12      | 4,5     | 0.027                  | -1       | 76.5     | 3500        | 2013 | Spin coating          | <sup>11</sup> |
| PCPDTBT:ZnO               | 70                 | 725       | 175       |            | 68      | 0.4                    |          |          |             | 2020 | Spin coating          | <sup>12</sup> |
| PSBOTz:PNDPO              |                    | 530       | 155       | 1.00E+13   | 16.4    | 0.07                   | -2.0     |          |             | 2020 | Spin coating          | <sup>13</sup> |
| DT-PDPP2T-TT/Y6           | 800                | 940       | 66        | 1.6E+13    |         | 0.2                    |          |          |             | 2020 | Spin coating          | <sup>14</sup> |
| 1(Pyrl):1(Hex):C60        |                    | 754       | 11        | 1.10E+10   | 14      | 0.086                  | 0        | 61       | 150,000     | 2021 | Spin coating          | <sup>15</sup> |
| DMQA:SubPc                |                    | 586       | 131       | 2.30E+12   | 60.1    | 0.27                   | -5.0     |          |             | 2013 | Vacuum processing     | <sup>16</sup> |

|                   |      |      |     |          |      |      |       |      |                            |      |                   |           |
|-------------------|------|------|-----|----------|------|------|-------|------|----------------------------|------|-------------------|-----------|
| SubNc             |      | 690  | 180 |          | 80   | 0.45 | -15.0 |      |                            | 2015 | Vacuum processing | 17        |
| DM-2,9-DMQA:SubPc |      | 580  | 115 | 2.00E+12 | 56.5 | 0.26 | -3.0  |      | 76700                      | 2014 | Vacuum processing | 18        |
| ISQ               |      | 680  | 80  | 3.20E+12 | 15   |      | -2.0  | 114  | 190,000                    | 2016 | Vacuum processing | 19        |
| Rubrene:C60       |      | 470  | 80  |          | 55   | 0.21 | -1.0  |      | 86,000                     | 2016 | Vacuum processing | 20        |
| M1:C60            |      | 550  | 67  | 3.73E+13 | 59   | 0.26 | -3.0  |      |                            | 2016 | Vacuum processing | 21        |
| PSQ               |      | 600  | 110 | 7.70E+12 | 66   | 0.32 | -2.5  | 96   |                            | 2017 | Vacuum processing | 22        |
| CiInPc:C60        |      | 705  | 190 | 3.30E+12 | 80   | 0.45 | -1.0  | 77   | 2900                       | 2019 | Vacuum processing | 23        |
| 1a:C60            |      | 560  | 97  | 4.37E+13 | 70   | 0.32 | -3.0  |      |                            | 2019 | Vacuum processing | 24        |
| SubPc:C60         |      | 600  | 70  | 7.50E+11 | 16   | 0.08 | -1.0  |      |                            | 2021 | Vacuum processing | 25        |
| PD940             | 6000 | 1100 | 61  | 1.17E+12 | 30   | 0.21 | -2    | >112 | 316 at -2V<br>1389 at -10V | 2022 | Blade coating     | This work |



## 8. Impedance fitting

The equivalent circuit shown in Figure S2(c1) is applied for EIS fitting, where R1 and CPE1 represent bulk resistance and bulk chemical capacitance, respectively; R2 and CPE2 represent interface resistance and interface chemical capacitance, respectively, and R3 represents series resistance.<sup>26</sup> The  $R_{\text{bulk}}$

increases with increasing PAL thickness. The equivalent capacitance is calculated by  $C = \frac{(R.CPE)^{1/n}}{R}$ .

The RC time is  $(R.CPE)^{1/n}$ .

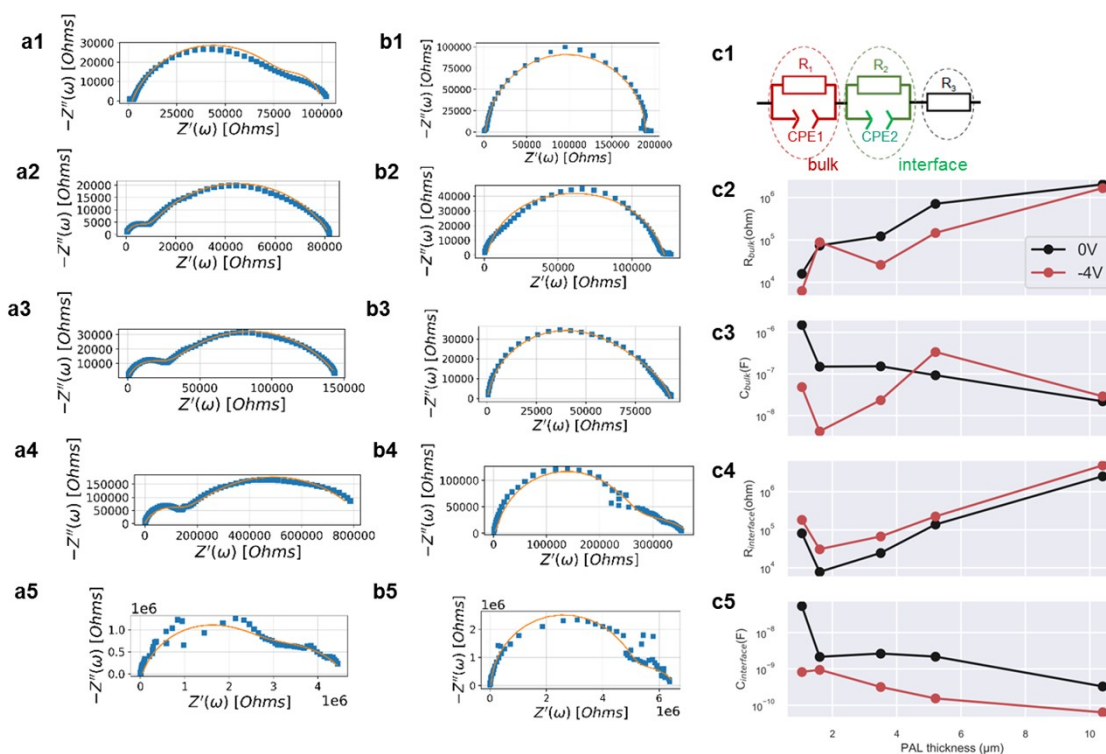

**Figure S6.** Impedance spectra measured at 0V (a1-a5) and -4V (b1-b5) under 520 nm LED illumination with intensity of 4.09 mW/cm<sup>2</sup> and their corresponding fitting results (orange line), (c1) equivalent circuit model for impedance fitting, where R1/CPE1 is related to the bulk, R2/CPE2 is related to the interface, and R3 us related to the series resistance. (c2-c5) the fitting results.

**Table S4.** Impedance fitting results at 0V

| PAL thickness | R1  | CPE1 | n1 |   | R2  | CPE2 | n2 | R3  |
|---------------|-----|------|----|---|-----|------|----|-----|
| μm            | ohm | F    |    | s | ohm | F    |    | ohm |

|      |          |          |          |          |          |          |          |          |
|------|----------|----------|----------|----------|----------|----------|----------|----------|
| 1.05 | 1.60e+04 | 1.52e-06 | 1.00e+00 | 2.43e-02 | 8.16e+04 | 5.39e-08 | 7.69e-01 | 1.92e+03 |
| 1.6  | 7.42e+04 | 1.50e-07 | 6.45e-01 | 9.36e-04 | 7.87e+03 | 2.15e-09 | 8.23e-01 | 3.05e-29 |
| 3.5  | 1.22e+05 | 1.53e-07 | 6.16e-01 | 1.56e-03 | 2.46e+04 | 2.64e-09 | 7.84e-01 | 1.33e-19 |
| 5.2  | 7.15e+05 | 9.32e-08 | 5.85e-01 | 9.76e-03 | 1.37e+05 | 2.18e-09 | 7.43e-01 | 8.75e-29 |
| 10.4 | 2.05e+06 | 2.19e-08 | 5.98e-01 | 5.57e-03 | 2.53e+06 | 3.30e-10 | 8.08e-01 | 3.79e+04 |

**Table S5.** Impedance fitting results at -4V

| PAL thickness | R1       | CPE1     | n1       | $\tau_1$ | R2       | CPE2     | n2       | R3       |
|---------------|----------|----------|----------|----------|----------|----------|----------|----------|
| $\mu\text{m}$ | ohm      | F        |          | s        | ohm      | F        |          | ohm      |
| 1.05          | 6.31e+03 | 4.85e-08 | 7.63e-01 | 2.48e-05 | 1.82e+05 | 8.25e-10 | 9.93e-01 | 1.57e+03 |
| 1.6           | 8.93e+04 | 4.14e-09 | 8.10e-01 | 5.79e-05 | 3.09e+04 | 9.47e-10 | 9.39e-01 | 1.85e+03 |
| 3.5           | 2.60e+04 | 2.34e-08 | 7.66e-01 | 6.34e-05 | 6.67e+04 | 3.19e-10 | 9.26e-01 | 1.19e+02 |
| 5.2           | 1.47e+05 | 3.39e-07 | 4.28e-01 | 9.05e-04 | 2.23e+05 | 1.54e-10 | 9.50e-01 | 2.43e+02 |
| 10.4          | 1.67e+06 | 2.90e-08 | 6.81e-01 | 1.17e-02 | 4.87e+06 | 6.38e-11 | 9.89e-01 | 3.88e+04 |

## 9. Optical simulation

The reflection and transmission of the structure are calculated using  $R = \left| \frac{M_{21}}{M_{11}} \right|^2$  and

$T = \frac{n_s \cos \theta_s}{n_0 \cos \theta_0} \left| \frac{1}{M_{11}} \right|^2$ , where  $M_{11}$  and  $M_{22}$  are derived from the matrix as follows.

$$[M_{11} \ M_{12} \ M_{21} \ M_{22}] = D_{12} P_2 \dots D_{i-1,i} P_i D_{i,i+1}$$

,where  $D_{i,i+1}$  is transmission matrix.

$$D_{i,i+1} = \frac{1}{t_{i,i+1}} [1 \ r_{i,i+1} \ r_{i,i+1} \ M_{22}]$$

,where  $r_{i,i+1}$  and  $t_{i,i+1}$  are Fresnel reflection and transmission coefficients.

For TE light propagation,

$$r_{i,i+1} = \frac{\tilde{n}_i \cos \theta_i - \tilde{n}_{i+1} \cos \theta_{i+1}}{\tilde{n}_i \cos \theta_i + \tilde{n}_{i+1} \cos \theta_{i+1}}$$

$$t_{i,i+1} = \frac{2\tilde{n}_i \cos \theta_i}{\tilde{n}_i \cos \theta_i + \tilde{n}_{i+1} \cos \theta_{i+1}}$$

For TM light propagation,

$$r_{i,i+1} = \frac{\tilde{n}_i \cos \theta_{i+1} - \tilde{n}_{i+1} \cos \theta_i}{\tilde{n}_i \cos \theta_{i+1} + \tilde{n}_{i+1} \cos \theta_i}$$

$$t_{i,i+1} = \frac{2\tilde{n}_i \cos \theta_i}{\tilde{n}_i \cos \theta_{i+1} + \tilde{n}_{i+1} \cos \theta_i}$$

, where  $\tilde{n}_i$  is the complex refractive index,  $\tilde{n}_i = n_i + jk_i$ .

The absorption in each layer is calculated from propagation matrix ( $P_i$ ).

$$P_i = \begin{bmatrix} e^{-j\phi_i} & 0 \\ 0 & e^{j\phi_i} \end{bmatrix}$$

, where  $\phi_i$  is the phase shift,  $\phi_i = \frac{2\pi}{\lambda} \tilde{n}_i h_i$ , where  $h_i$  is the thickness of i layer

Optical absorption ( $P_{abs}$ ) is directly proportional to the whole E-field intensity ( $|E|^2$ ). It can be expressed as

$$P_{abs} = \frac{1}{2} \omega \epsilon_0 n k |E|^2$$

where  $\omega$  is the angular frequency,  $\epsilon_0$  is the vacuum permittivity and  $n$  and  $k$  are the real and imaginary parts of the refractive index.<sup>27,28,29</sup>

## 10. Optical setup

The setup of NIR imaging by narrowband organic photodetector is shown in **Figure S5a**. The monochromatic light at 1100 nm wavelength passing an optical chopper with a chopping frequency of 400 Hz is applied as a light source. The Si sample is placed on X-Z motorized stage and OPD is placed next to the sample holder. The scanning of the image is done by moving the X-Z motorized stage controlled by a microcontroller. The photocurrent at each scan point is acquired by a lock-in amplifier.

The setup for angularly and spectrally resolved EQE spectra is shown in **Figure S5b**. The monochromatic light at various wavelengths passing an optical chopper with a chopping frequency of 400 Hz is applied as a light source. The OPD is placed on a rotational stage. The photocurrent of OPD at each angle and

applied bias is acquired by a lock-in amplifier. The light intensity is calibrated by a Si (818-UV) and Ge (818-IR) reference cell.

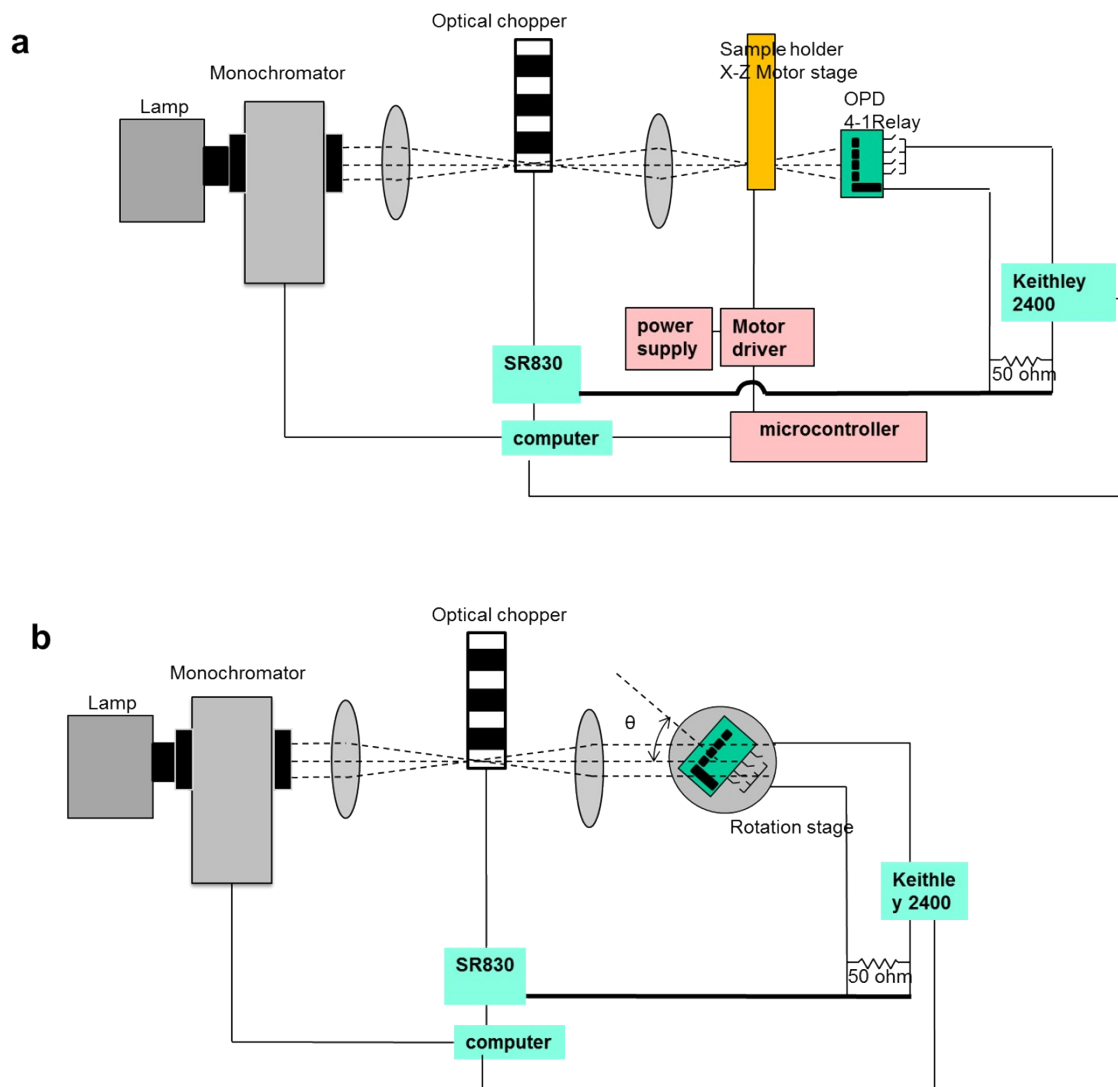

**Figure S7.** (a) Illustration of the image scanner setup composed of a light source, an x-z two-axis moving stage, and an organic photodetector readout circuit measured at the monochromatic light illumination of 1100 nm in transmission mode. (b) Illustration of the angular-dependent EQE scan setup.

## References

---

- <sup>1</sup> R. D. Jansen-Van Vuuren, A. Pivrikas, A. K. Pandey and P. L. Burn, *J. Mater. Chem. C*, 2013, **1**, 3532–3543.
- <sup>2</sup> D. M. Lyons, A. Armin, M. Stolterfoht, R. C. R. Nagiri, R. D. Jansen-Van Vuuren, B. N. Pal, P. L. Burn, S. C. Lo and P. Meredith, *Org. Electron.*, 2014, **15**, 2903–2911.
- <sup>3</sup> H. Zhang, S. Jenatsch, J. De Jonghe, F. Nuësch, R. Steim, A. C. Véron and R. Hany, *Sci. Rep.*, 2015, **5**, 9439.
- <sup>4</sup> A. Armin, R. D. J. Vuuren, N. Kopidakis, P. L. Burn, P. Meredith, *Nat. Commun.*, 2015, **6**, 6343.
- <sup>5</sup> L. Shen, Yang. Zhang, Y. Bai, X. Zheng, Q. Wang, J. Huang, *Nanoscale*, 2016, **8**, 12990.
- <sup>6</sup> J. Miao, F. Zhang, M. Du, W. Wang, Y. Fang, *Adv. Opt. Mater.*, 2018, **6**, 1800001.
- <sup>7</sup> A. Liess, A. Arjona-Esteban, A. Kudzus, J. Albert, A. M. Krause, A. Lv, M. Stolte, K. Meerholz and F. Würthner, *Adv. Funct. Mater.*, 2019, **29**, 1805058.
- <sup>8</sup> K. Xia, Y. Li, Y. Wang, L. Portilla and V. Pecunia, *Adv. Opt. Mater.*, 2020, **8**, 1902056.
- <sup>9</sup> S. Z. Hassan, H. J. Cheon, C. Choi, S. Yoon, M. Kang, J. Cho, Y. H. Jang, S. K. Kwon, D. S. Chung and Y. H. Kim, *ACS Appl. Mater. Interfaces*, 2019, **11**, 28106–28114.
- <sup>10</sup> H. Opoku, B. Lim, E. S. Shin, H. Kong, J. M. Park, C. Bathula and Y. Y. Noh, *Macromol. Chem. Phys.*, 2019, **220**, 1900287.
- <sup>11</sup> J. Kim, S. Yoon, K. M. Sim, D. S. Chung, *J. Mater. Chem. C*, **2019**, **7**, 4770.
- <sup>12</sup> J. Y. Kim, P. Vincent, J. Jang, M. S. Jang, M. Choi, J. H. Bae, C. Lee and H. Kim, *J. Alloys Compd.*, 2020, **813**, 152202.
- <sup>13</sup> J. Kang, J. Kim, H. Ham, H. Ahn, S. Y. Lim, H. M. Kim, I. N. Kang and I. H. Jung, *Adv. Opt. Mater.*, 2020, **8**, 2001038.
- <sup>14</sup> B. Xie, R. Xie, K. Zhang, Q. Yin, Z. Hu, G. Yu, F. Huang, Y. Cao, *Nat. Commun.*, 2020, **11**, 2871.
- <sup>15</sup> T. Schembri, J. H. Kim, A. Liess, V. Stepanenko, M. Stolte and F. Würthner, *Adv. Opt. Mater.*, 2021, **9**, 2100213.
- <sup>16</sup> K. H. Lee, D. S. Leem, J. S. Castrucci, K. B. Park, X. Bulliard, K. S. Kim, Y. W. Jin, S. Lee, T. P. Bender and S. Y. Park, *ACS Appl. Mater. Interfaces*, 2013, **5**, 13089–13095.
- <sup>17</sup> H. O. Toshikatsu Sakai, H. Seo and T. Takagi, *MRS Adv.*, 2015, **1**, 459–464.
- <sup>18</sup> S. J. Lim, D. S. Leem, K. B. Park, K. S. Kim, S. Sul, K. Na, G. H. Lee, C. J. Heo, K. H. Lee, X. Bulliard, R. I. Satoh, T. Yagi, T. Ro, D. Im, J. Jung, M. Lee, T. Y. Lee, M.

- 
- G. Han, Y. W. Jin and S. Lee, *Sci. Rep.*, 2015, **5**, 7708.
- <sup>19</sup> W. Li, D. Li, G. Dong, L. Duan, J. Sun, D. Zhang and L. Wang, *Laser Photonics Rev.*, 2016, **10**, 473–480.
- <sup>20</sup> W. Li, S. Li, L. Duan, H. Chen, L. Wang, G. Dong and Z. Xu, *Org. Electron.*, 2016, **37**, 346–351.
- <sup>21</sup> M. G. Han, K. B. Park, X. Bulliard, G. H. Lee, S. Yun, D. S. Leem, C. J. Heo, T. Yagi, R. Sakurai, T. Ro, S. J. Lim, S. Sul, K. Na, J. Ahn, Y. W. Jin and S. Lee, *ACS Appl. Mater. Interfaces*, 2016, **8**, 26143–26151.
- <sup>22</sup> W. Li, H. Guo, Z. Wang and G. Dong, *J. Phys. Chem. C*, 2017, **121**, 15333–15338.
- <sup>23</sup> C. W. Joo, J. Kim, J. Moon, K. M. Lee, J. E. Pi, S. Y. Kang, S. D. Ahn, Y. S. Park and D. S. Chung, *Org. Electron.*, 2019, **70**, 101–106.
- <sup>24</sup> G. H. Lee, X. Bulliard, S. Yun, D.-S. Leem, K.-B. Park, K.-H. Lee, C.-J. Heo, I.-S. Jung, J.-H. Kim, Y. S. Choi, S.-J. Lim and Y. W. Jin, *Opt. Express*, 2019, **27**, 25410–25419.
- <sup>25</sup> D. Shen, Z. Guan, M. Li, S.-W. Tsang, W. Zhang, M.-F. Lo and C.-S. Lee, *J. Mater. Chem. C*, 2021, **9**, 3814.
- <sup>26</sup> Y. Lin, Y. Firdaus, F. H. Isikgor, M. I. Nugraha, E. Yengel, G. T. Harrison, R. Hallani, A. El-Labban, H. Faber, C. Ma, X. Zheng, A. Subbiah, C. T. Howells, O. M. Bakr, I. McCulloch, S. De Wolf, L. Tsetseris, T. D. Anthopoulos, *ACS Energy Lett.*, 2020, **5**, 9, 2935–2944.
- <sup>27</sup> H. Kocer, S. Butun, Z. Li, and K. Aydin, *Sci. Rep.*, 2015, **5**, 8157.
- <sup>28</sup> X. Wang, J. Wang, Z. D. Hu, T. Sang, and Y. Feng, *Appl. Phys. Express*, 2018, **11**, 6, 062601.
- <sup>29</sup> J. Ma, J. Wang, Z. D. Hu, Z. Zhang, L. Pan, A. Di Falco, *AIP Advances*, 2019, **9**, 115007.
